# Supplementary material for: MiR-23b and miR-133 Cotarget TGFβ2/NOTCH1 in Sheep Dermal Fibroblasts, Affecting Hair Follicle Development
Source: MDPI journal article supplement (doi:10.3390/cells13060557), 2024-03-21
Supplement: s1 [file s1]

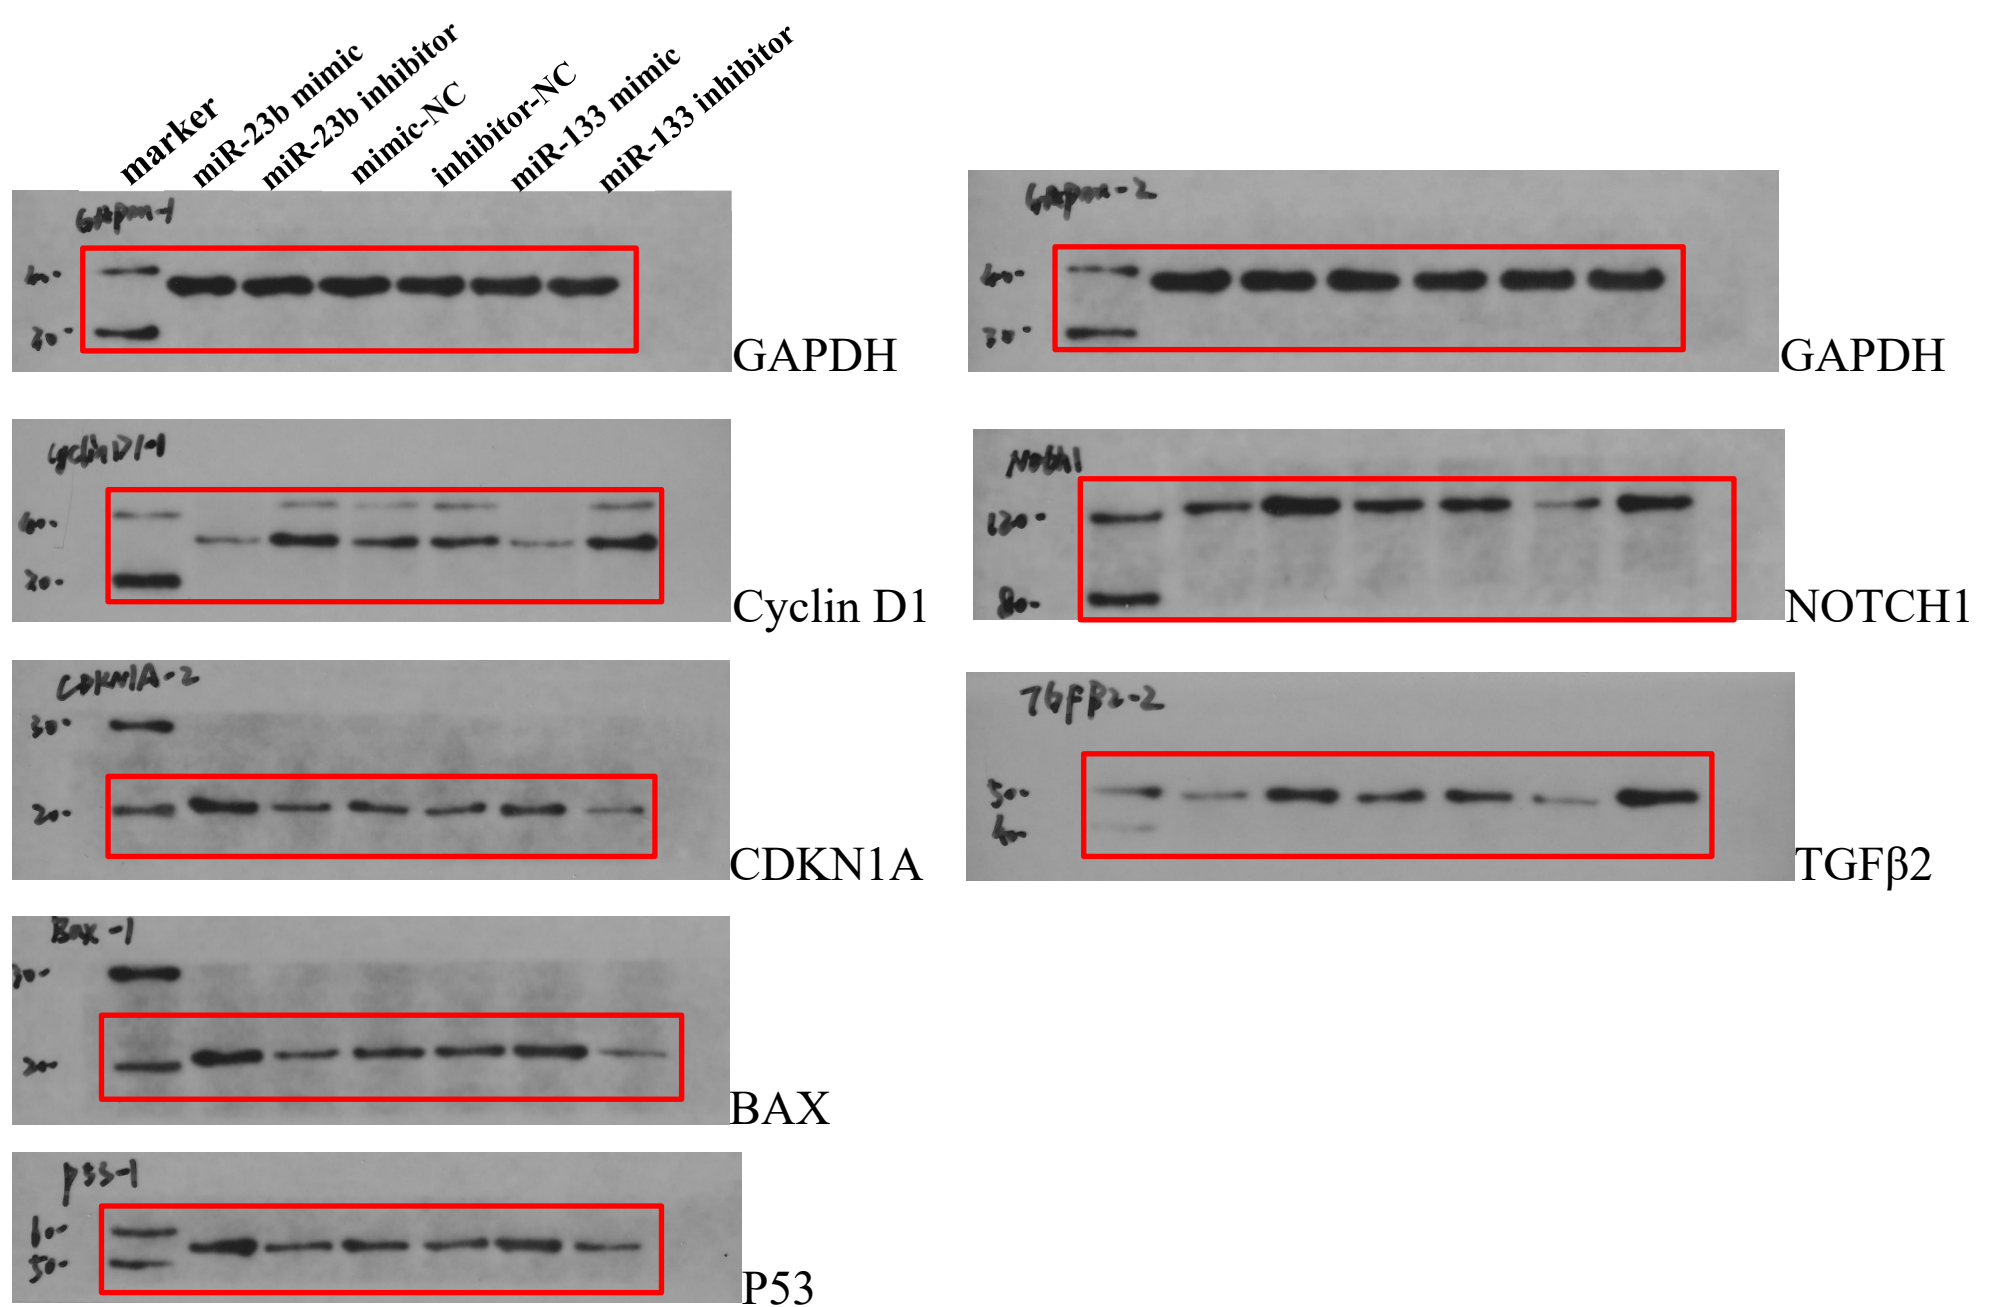

Figure S5. Original image of Western blotting. The order of loading is **marker**, **miR-23b mimic**, **miR-23b inhibitor**, **mimic-NC**, **inhibitor-NC**, **miR-133 mimic**, **miR-133 inhibitor**. The red box represents the part of the manuscript where the images are displayed.
