# Supplementary material for: MiR-23b and miR-133 Cotarget TGFβ2/NOTCH1 in Sheep Dermal Fibroblasts, Affecting Hair Follicle Development
Source: Cells. 2024 Mar 21;13(6):557. doi: 10.3390/cells13060557 (PMC10969380; doi:10.3390/cells13060557)
Supplement: Supplementary file 1 [file cells-13-00557-s001.zip]

Archive with 8 entries (8 files):
- Supplementary Files/Additional file 1-Figure S1.pdf
- Supplementary Files/Additional file 2-Figure S2.pdf
- Supplementary Files/Additional file 3-Figure S3 .pdf
- Supplementary Files/Additional file 4-Figure S4.pdf
- Supplementary Files/Additional file 5-Figure S5.pdf
- Supplementary Files/Additional file 6-Table S1.xlsx
- Supplementary Files/Additional file 7-Table S2.xlsx
- Supplementary Files/Additional file 8-Table S3.xlsx
