# Supplementary figures and images for: MiR-23b and miR-133 Cotarget TGFβ2/NOTCH1 in Sheep Dermal Fibroblasts, Affecting Hair Follicle Development
Source: MDPI journal article supplement (doi:10.3390/cells13060557), 2024-03-21

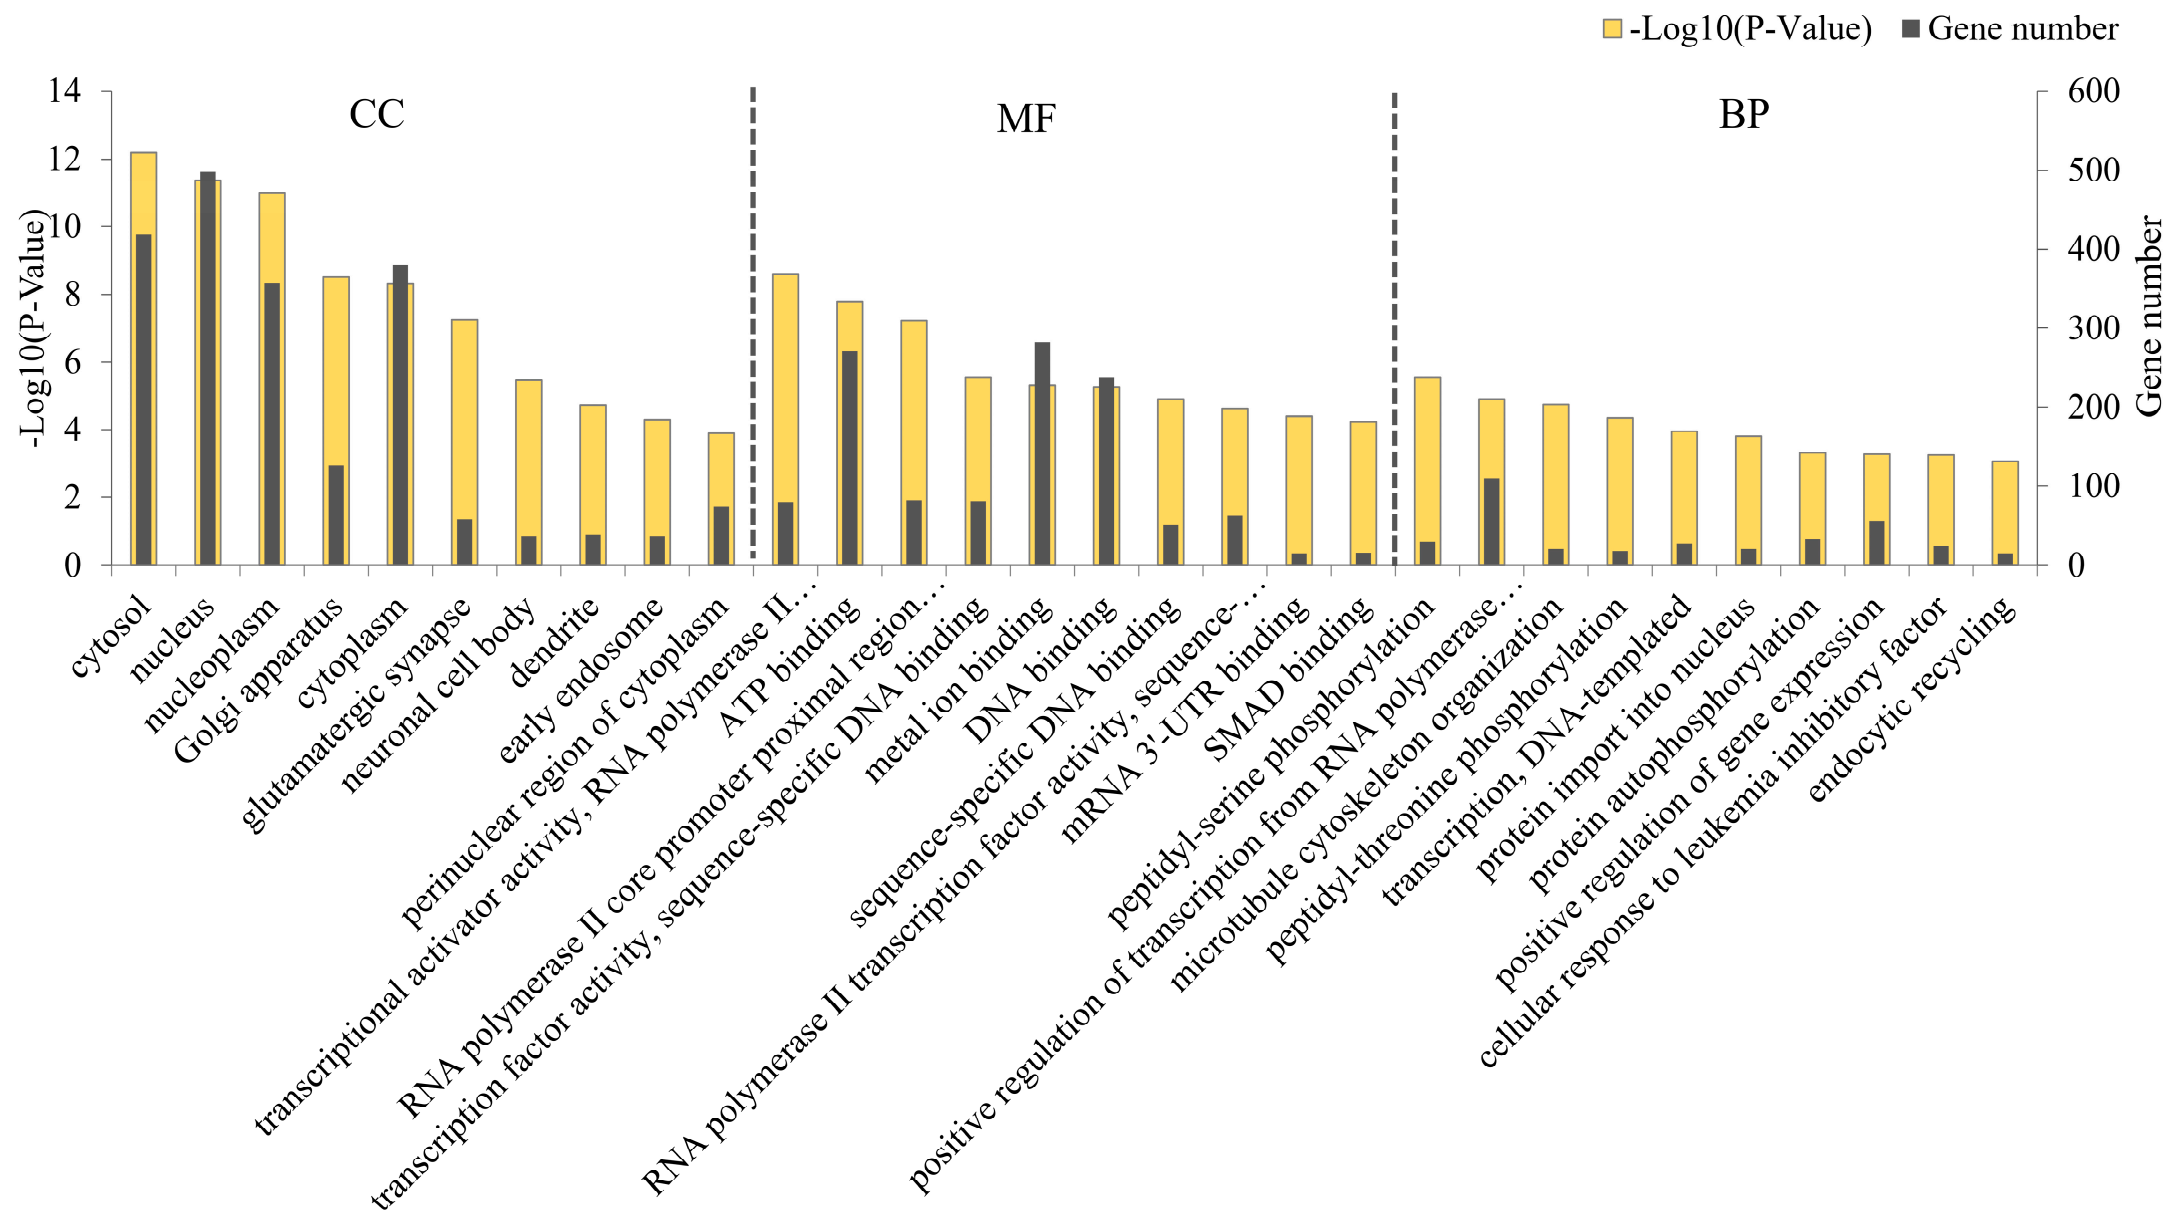

Figure S1. oar-miR-23b target genes top 10 GO functional enrichment histogram.

Supplement: s1 [file s1]

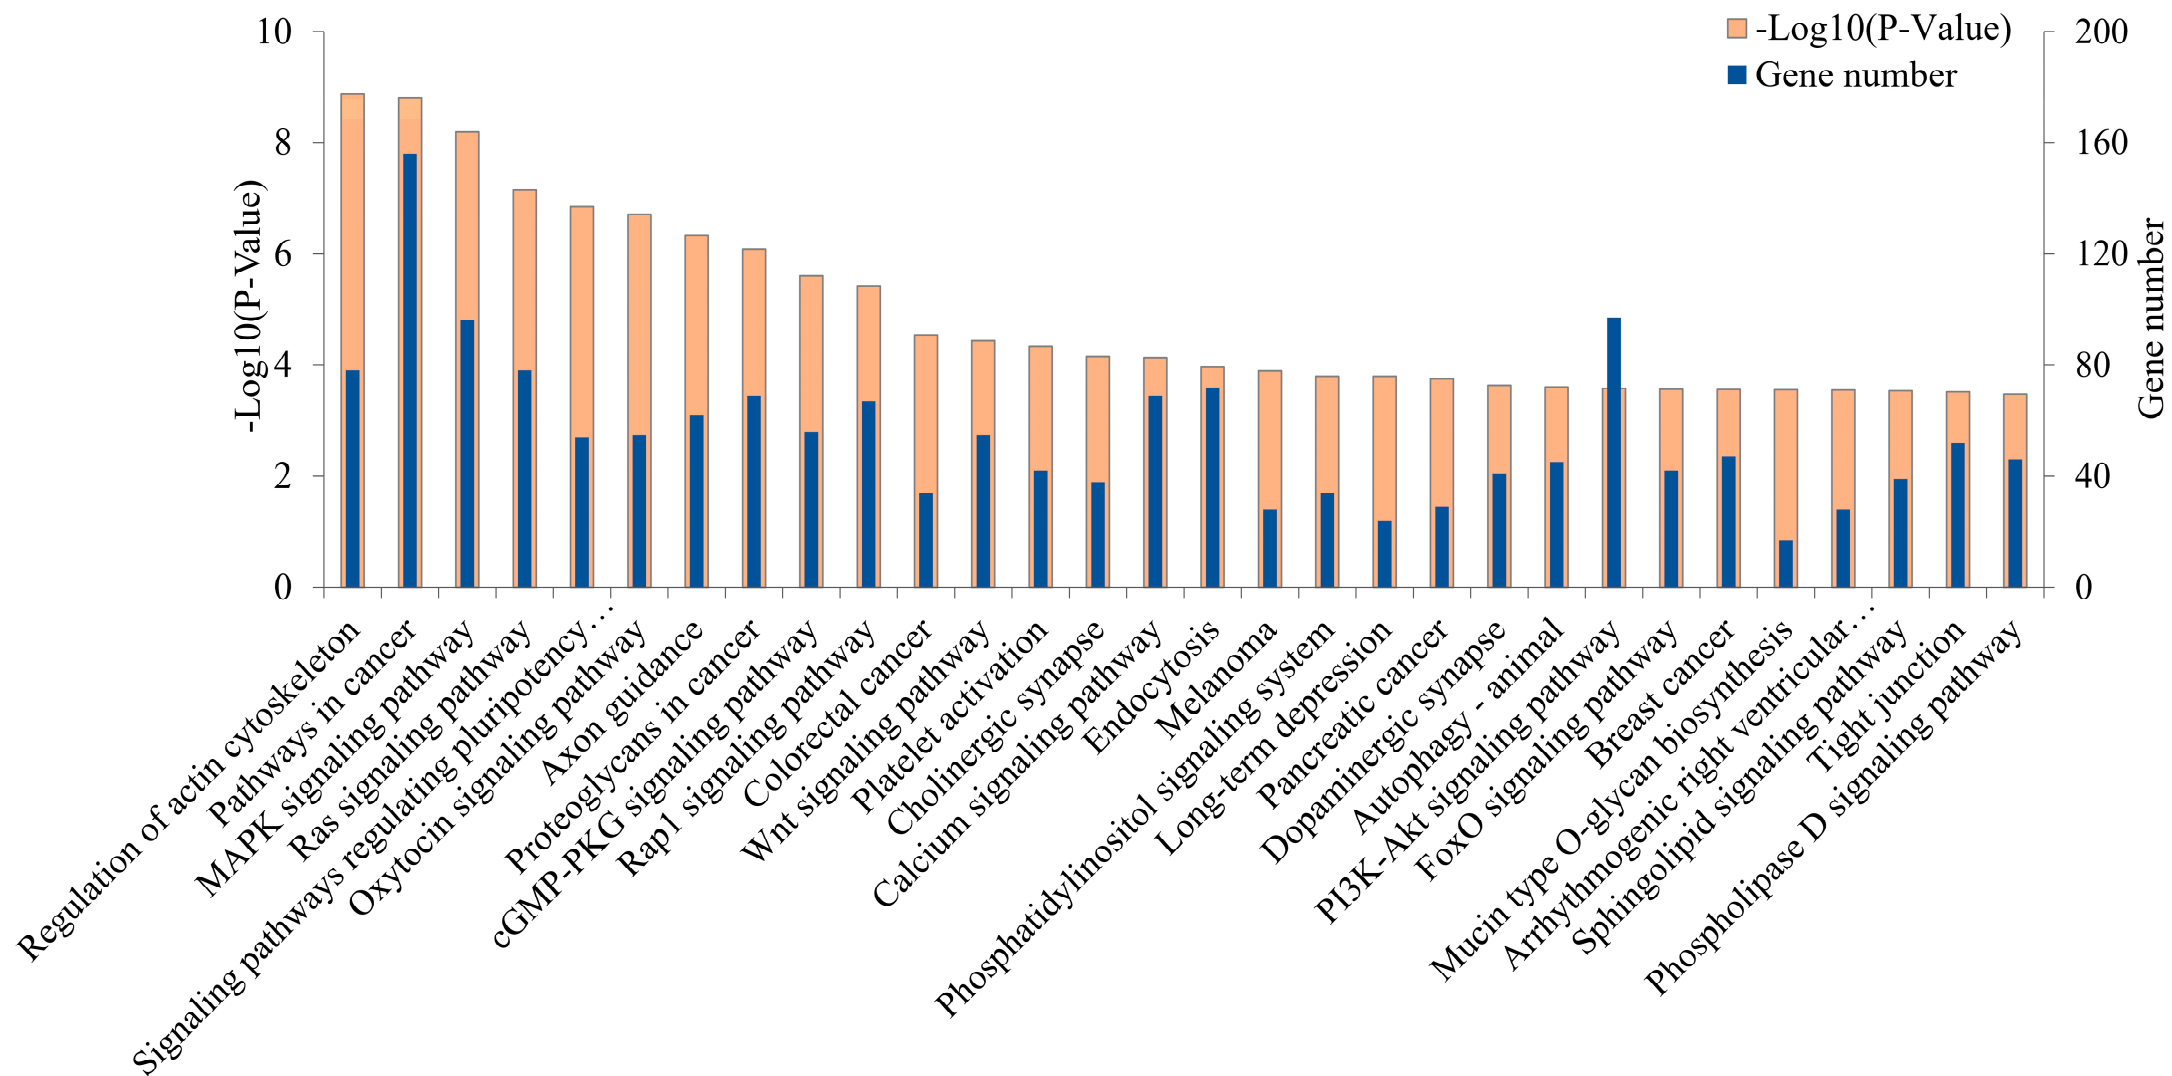

Figure S4. oar-miR-133 target genes top 30 KEGG functional enrichment histogram.

Supplement: s1 [file s1]

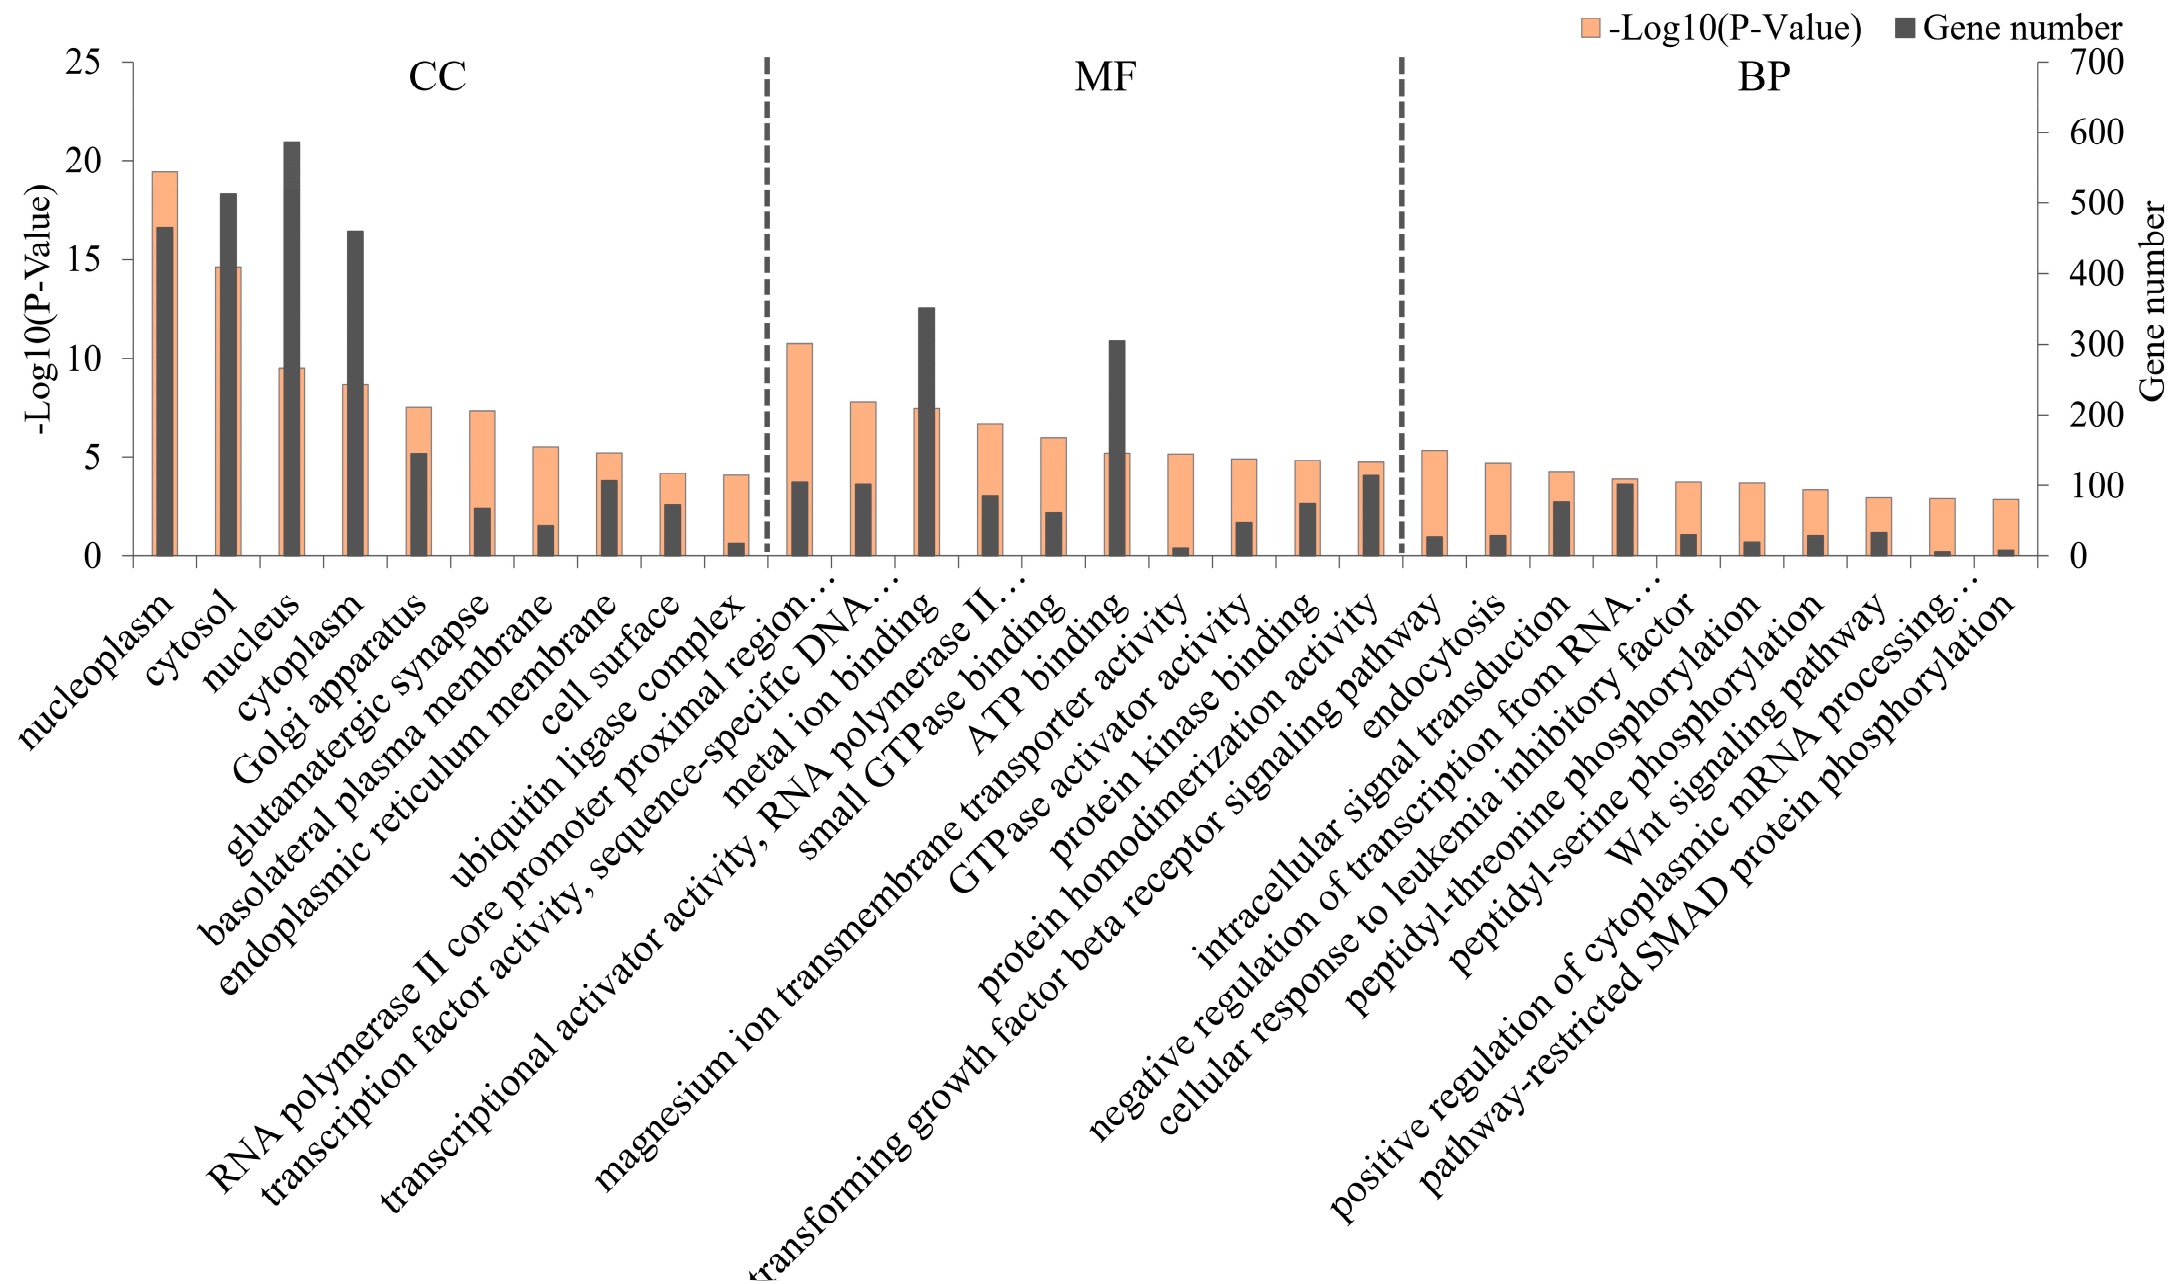

Figure S2. oar-miR-133 target genes top 10 GO functional enrichment histogram.

Supplement: s1 [file s1]

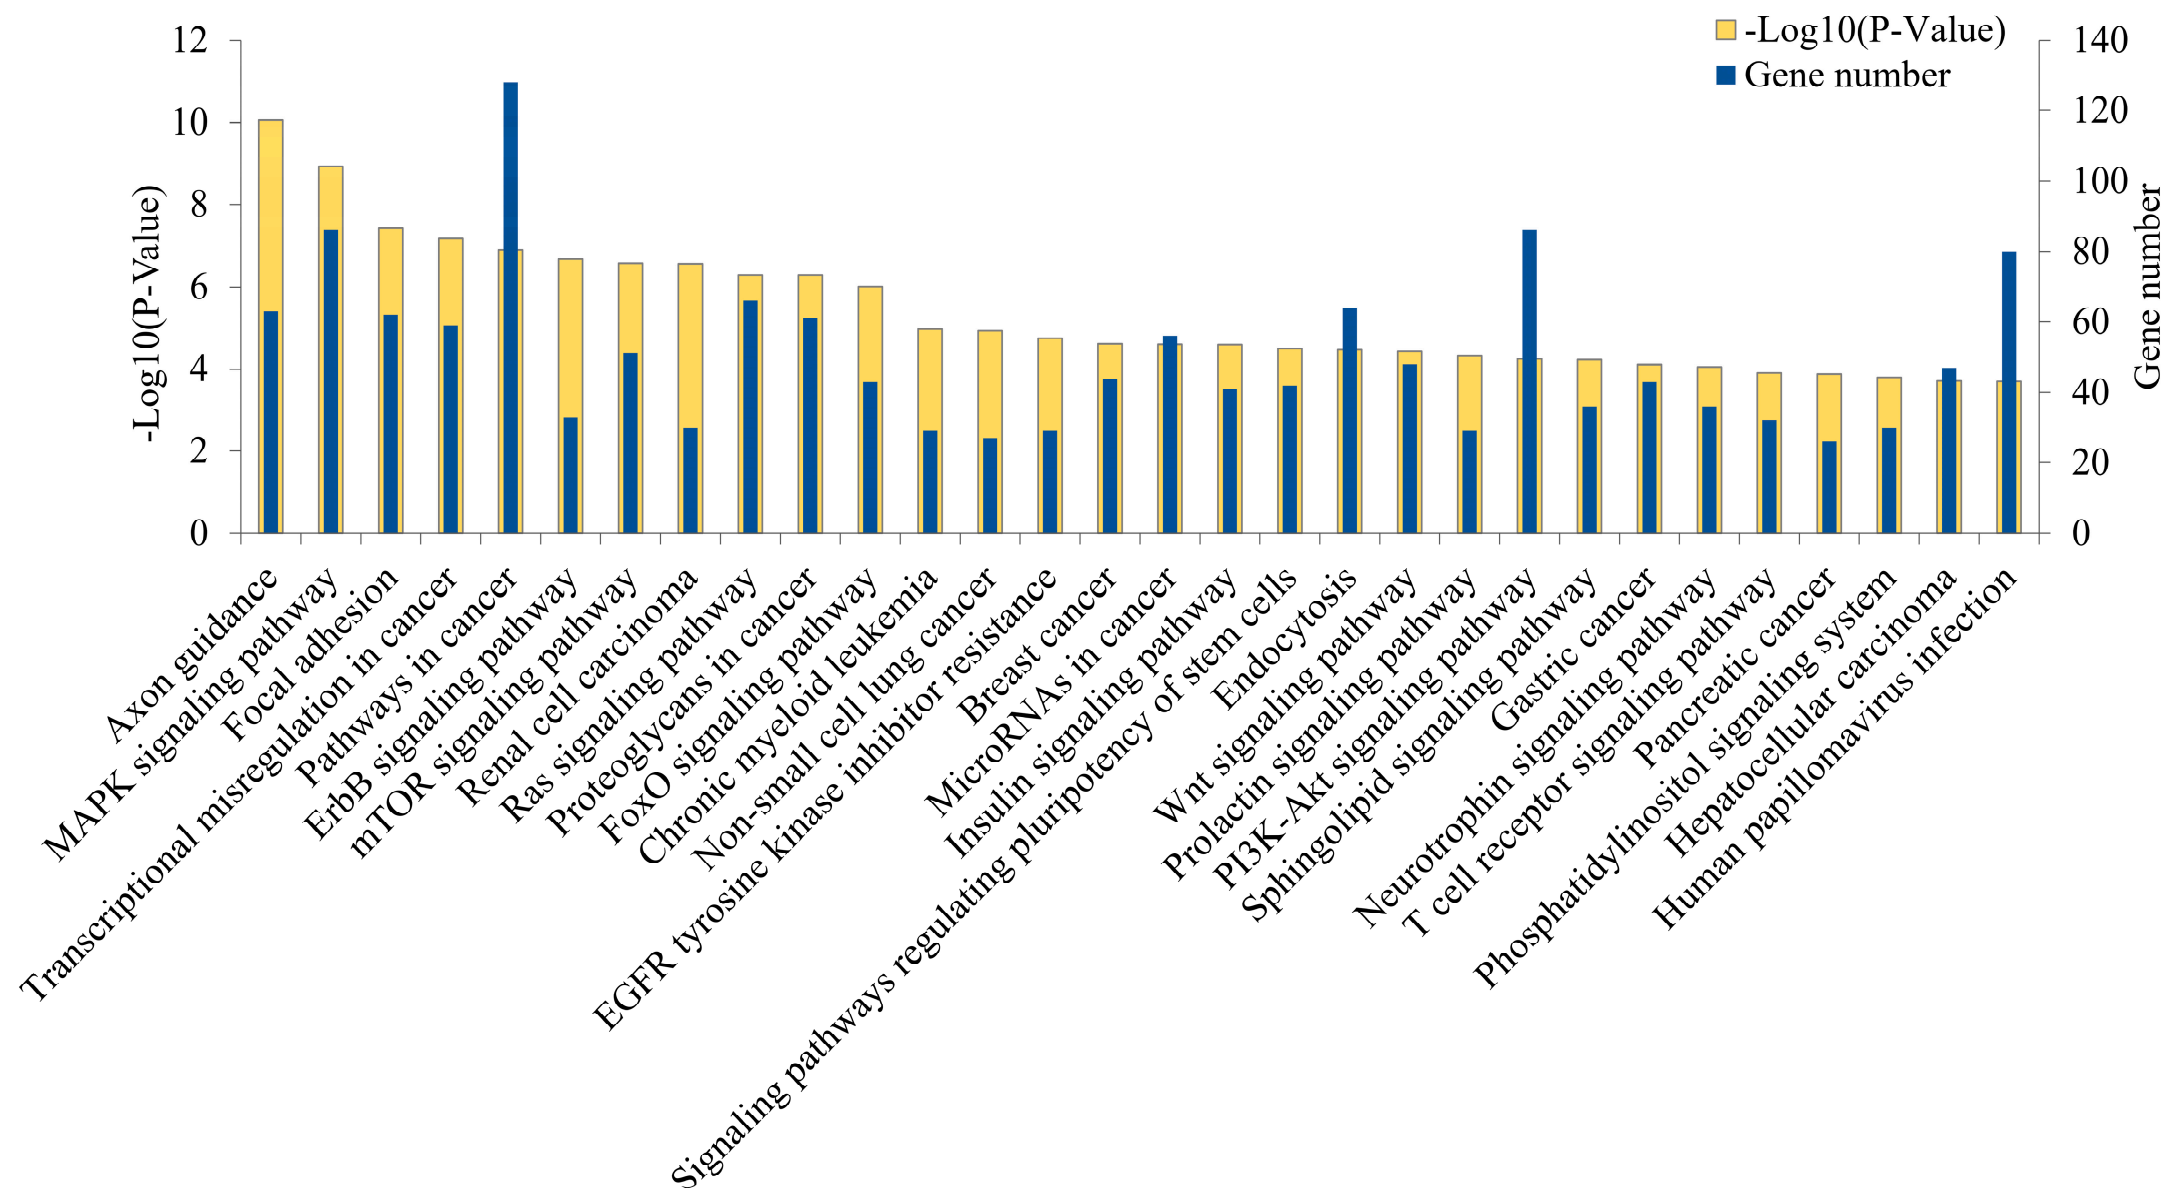

Figure S3. oar-miR-23b target genes top 30 KEGG functional enrichment histogram.

Supplement: s1 [file s1]
